# Supplementary material for: How can Big Data Analytics Support People-Centred and Integrated Health Services: A Scoping Review
Source: PubMed Central journal article supplement (PMC9205381; doi:10.5334/ijic.5543), 2022-06-16
Supplement: ijic-22-2-5543-s1.pdf [file ijic-22-2-5543-s1.pdf]

## Appendix

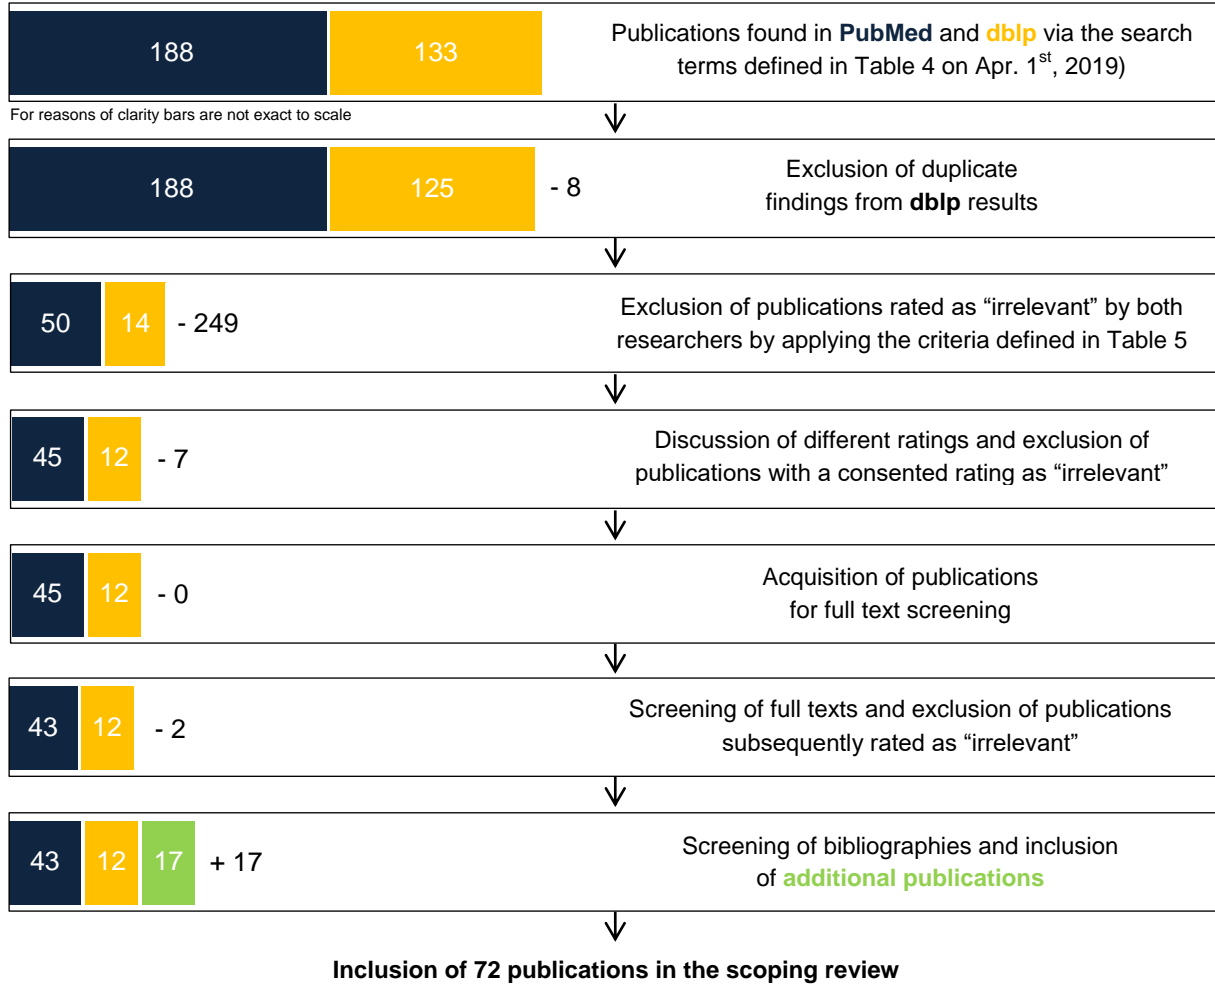

Figure 4: Graphical representation of the scoping review process

## Search terms and data

| Database | Data type                            | Search term                                                                                                                                                                                                                                                                                                                                                       | Language | Search Fields      | Limiters | Search results (Apr. 1 <sup>st</sup> , 2019) | Proportion |
|----------|--------------------------------------|-------------------------------------------------------------------------------------------------------------------------------------------------------------------------------------------------------------------------------------------------------------------------------------------------------------------------------------------------------------------|----------|--------------------|----------|----------------------------------------------|------------|
| Pub Med  | Electronic health record data        | (big data analy* [Title/Abstract]<br>OR advanced analy* [Title/Abstract]<br>OR predictive analy* [Title/Abstract]<br>OR machine learning [Title/Abstract]<br>AND (EHR [Title/Abstract]<br>OR EMR [Title/Abstract]<br>OR electronic health record* [Title/Abstract]<br>OR electronic medical record* [Title/Abstract]))                                            | English  | Title/<br>Abstract | Journals | 467                                          | 5.45%      |
| Pub Med  | Transactional claims data            | ((big data analy* [Title/Abstract]<br>OR advanced analy* [Title/Abstract]<br>OR predictive analy* [Title/Abstract]<br>OR machine learning [Title/Abstract])<br>AND (claim* [Title/Abstract]<br>OR administrative data [Title/Abstract]<br>OR transactions data [Title/Abstract]<br>OR billing data [Title/Abstract]<br>OR health business data [Title/Abstract])) | English  | Title/<br>Abstract | Journals | 178                                          | 2.08%      |
| Pub Med  | Data from clinical registries        | ((big data analy* [Title/Abstract]<br>OR advanced analy* [Title/Abstract]<br>OR predictive analy* [Title/Abstract]<br>OR machine learning [Title/Abstract])<br>AND (registry [Title/Abstract] OR registries [Title/Abstract]))                                                                                                                                    | English  | Title/<br>Abstract | Journals | 99                                           | 1.16%      |
| Pub Med  | Smart sensor and smart device data   | ((big data analy* [Title/Abstract]<br>OR advanced analy* [Title/Abstract]<br>OR predictive analy* [Title/Abstract]<br>OR machine learning [Title/Abstract])<br>AND (device* [Title/Abstract]<br>OR sensor* [Title/Abstract]<br>OR smartphone* [Title/Abstract]<br>OR wearable* [Title/Abstract]))                                                                 | English  | Title/<br>Abstract | Journals | 1,370                                        | 15.99%     |
| Pub Med  | Internet usage and social media data | ((big data analy* [Title/Abstract]<br>OR advanced analy* [Title/Abstract]<br>OR predictive analy* [Title/Abstract]<br>OR machine learning [Title/Abstract])                                                                                                                                                                                                       | English  | Title/<br>Abstract | Journals | 223                                          | 2.60%      |

|            |                                                        |                                                                                                                                                                                                                                                                                                                               |         |                    |          |       |        |
|------------|--------------------------------------------------------|-------------------------------------------------------------------------------------------------------------------------------------------------------------------------------------------------------------------------------------------------------------------------------------------------------------------------------|---------|--------------------|----------|-------|--------|
|            |                                                        | AND (social media [Title/Abstract]<br>OR web search [Title/Abstract]<br>OR health portal [Title/Abstract]<br>OR health information [Title/Abstract]))                                                                                                                                                                         |         |                    |          |       |        |
| Pub<br>Med | Data from<br>clinical trials                           | ((big data analy* [Title/Abstract]<br>OR advanced analy* [Title/Abstract]<br>OR predictive analy* [Title/Abstract]<br>OR machine learning [Title/Abstract])<br>AND (clinical trial [Title/Abstract]<br>OR RCT [Title/Abstract]<br>OR controlled trial [Title/Abstract]))                                                      | English | Title/<br>Abstract | Journals | 137   | 1.60%  |
| Pub<br>Med | Imaging data                                           | ((big data analy* [Title/Abstract]<br>OR advanced analy* [Title/Abstract]<br>OR predictive analy* [Title/Abstract]<br>OR machine learning [Title/Abstract])<br>AND (*imaging [Title/Abstract]<br>OR images [Title/Abstract]))                                                                                                 | English | Title/<br>Abstract | Journals | 2,644 | 30.86% |
| Pub<br>Med | Biomarker<br>data                                      | ((big data analy* [Title/Abstract]<br>OR advanced analy* [Title/Abstract]<br>OR predictive analy* [Title/Abstract]<br>OR machine learning [Title/Abstract])<br>AND (omics [Title/Abstract]<br>OR gene [Title/Abstract]<br>OR genetic [Title/Abstract]<br>OR DNA [Title/Abstract]<br>OR Biomarker [Title/Abstract]))           | English | Title/<br>Abstract | Journals | 3,370 | 39.34% |
| Pub<br>Med | Health-<br>related<br>systems data                     | ((big data analy* [Title/Abstract]<br>OR advanced analy* [Title/Abstract]<br>OR predictive analy* [Title/Abstract]<br>OR machine learning [Title/Abstract])<br>AND (socio-economic data<br>[Title/Abstract]<br>OR census [Title/Abstract]<br>OR location data [Title/Abstract]<br>OR environmental data<br>[Title/Abstract])) | English | Title/<br>Abstract | Journals | 52    | 0.61%  |
| Pub<br>Med | Patient-<br>reported<br>outcomes<br>and survey<br>data | ((big data analy* [Title/Abstract]<br>OR advanced analy* [Title/Abstract]<br>OR predictive analy* [Title/Abstract]<br>OR machine learning [Title/Abstract])<br>AND (patient reported outcome<br>[Title/Abstract]                                                                                                              | English | Title/<br>Abstract | Journals | 27    | 0.32%  |

|  |  |                                                              |  |  |  |  |  |
|--|--|--------------------------------------------------------------|--|--|--|--|--|
|  |  | OR PROM [Title/Abstract]<br>OR survey data [Title/Abstract]) |  |  |  |  |  |
|--|--|--------------------------------------------------------------|--|--|--|--|--|

Table 4: Search terms for the rapid review on big data types in healthcare

| Database | Data type           | Search term                                                                                                                                                                                                  | Language | Search Fields      | Limiters | Search results (Apr. 1 <sup>st</sup> , 2019) | Proportion |
|----------|---------------------|--------------------------------------------------------------------------------------------------------------------------------------------------------------------------------------------------------------|----------|--------------------|----------|----------------------------------------------|------------|
| PubMed   | Logistic regression | ((big data analy* [Title/Abstract]<br>OR advanced analy* [Title/Abstract]<br>OR predictive analy* [Title/Abstract]<br>OR machine learning [Title/Abstract])<br>AND ("logistic regression" [Title/Abstract])) | English  | Title/<br>Abstract | Journals | 1,026                                        | 12.03%     |
| PubMed   | Linear regression   | ((big data analy* [Title/Abstract]<br>OR advanced analy* [Title/Abstract]<br>OR predictive analy* [Title/Abstract]<br>OR machine learning [Title/Abstract])<br>AND ("linear regression" [Title/Abstract]))   | English  | Title/<br>Abstract | Journals | 312                                          | 3.66%      |
| PubMed   | Neural network      | ((big data analy* [Title/Abstract]<br>OR advanced analy* [Title/Abstract]<br>OR predictive analy* [Title/Abstract]<br>OR machine learning [Title/Abstract])<br>AND ("neural network" [Title/Abstract]))      | English  | Title/<br>Abstract | Journals | 1,742                                        | 20.43%     |
| PubMed   | Bayesian network    | ((big data analy* [Title/Abstract]<br>OR advanced analy* [Title/Abstract]<br>OR predictive analy* [Title/Abstract]<br>OR machine learning [Title/Abstract])<br>AND ("Bayesian network" [Title/Abstract]))    | English  | Title/<br>Abstract | Journals | 123                                          | 1.44%      |
| PubMed   | Decision tree       | ((big data analy* [Title/Abstract]<br>OR advanced analy* [Title/Abstract]<br>OR predictive analy* [Title/Abstract]<br>OR machine learning [Title/Abstract])<br>AND ("decision tree" [Title/Abstract]))       | English  | Title/<br>Abstract | Journals | 569                                          | 6.67%      |
| PubMed   | k-nearest neighbour | ((big data analy* [Title/Abstract]<br>OR advanced analy* [Title/Abstract]<br>OR predictive analy* [Title/Abstract]<br>OR machine learning [Title/Abstract])<br>AND ("k-nearest" [Title/Abstract]))           | English  | Title/<br>Abstract | Journals | 517                                          | 6.06%      |
| PubMed   | Random forest       | ((big data analy* [Title/Abstract]<br>OR advanced analy* [Title/Abstract])                                                                                                                                   | English  | Title/<br>Abstract | Journals | 1,664                                        | 19.51%     |

|        |                           |                                                                                                                                                                                                                |         |                    |          |       |        |
|--------|---------------------------|----------------------------------------------------------------------------------------------------------------------------------------------------------------------------------------------------------------|---------|--------------------|----------|-------|--------|
|        |                           | OR predictive analy* [Title/Abstract]<br>OR machine learning [Title/Abstract]<br>AND ("random forest" [Title/Abstract]))                                                                                       |         |                    |          |       |        |
| PubMed | k-means clustering        | ((big data analy* [Title/Abstract]<br>OR advanced analy* [Title/Abstract]<br>OR predictive analy* [Title/Abstract]<br>OR machine learning [Title/Abstract]<br>AND ("k-means" [Title/Abstract]))                | English | Title/<br>Abstract | Journals | 163   | 1.91%  |
| PubMed | Support vector machine    | ((big data analy* [Title/Abstract]<br>OR advanced analy* [Title/Abstract]<br>OR predictive analy* [Title/Abstract]<br>OR machine learning [Title/Abstract]<br>AND ("support vector machine" [Title/Abstract])) | English | Title/<br>Abstract | Journals | 2,327 | 27.29% |
| PubMed | Regularized regression    | ((big data analy* [Title/Abstract]<br>OR advanced analy* [Title/Abstract]<br>OR predictive analy* [Title/Abstract]<br>OR machine learning [Title/Abstract]<br>AND ("regularized regression" [Title/Abstract])) | English | Title/<br>Abstract | Journals | 22    | 0.26%  |
| PubMed | Multiple regression       | ((big data analy* [Title/Abstract]<br>OR advanced analy* [Title/Abstract]<br>OR predictive analy* [Title/Abstract]<br>OR machine learning [Title/Abstract]<br>AND ("multiple regression" [Title/Abstract]))    | English | Title/<br>Abstract | Journals | 43    | 0.50%  |
| PubMed | Proportional hazard model | ((big data analy* [Title/Abstract]<br>OR advanced analy* [Title/Abstract]<br>OR predictive analy* [Title/Abstract]<br>OR machine learning [Title/Abstract]<br>AND ("proportional hazard" [Title/Abstract]))    | English | Title/<br>Abstract | Journals | 19    | 0,22%  |

Table 5: Search terms for the rapid review on analytical methods for BDA in healthcare

| Database | Search term                                                                                                                                                 | Language | Search Fields      | Limiters                                                         | Search results (Apr. 1 <sup>st</sup> , 2019) |
|----------|-------------------------------------------------------------------------------------------------------------------------------------------------------------|----------|--------------------|------------------------------------------------------------------|----------------------------------------------|
| PubMed   | (<br>big data analy*[Title/Abstract]<br>OR advanced analy*[Title/Abstract]<br>OR predictive analy*[Title/Abstract]<br>OR (machine learning [Title/Abstract] | English  | Title/<br>Abstract | Case report,<br>guideline,<br>observational<br>study,<br>review, | 188                                          |

|      |                                                                                                                                                                                                                                                                                                             |         |     |                                        |     |
|------|-------------------------------------------------------------------------------------------------------------------------------------------------------------------------------------------------------------------------------------------------------------------------------------------------------------|---------|-----|----------------------------------------|-----|
|      | AND<br>observational [Title/Abstract])<br>)<br>NOT (genetic* [Title/Abstract]<br>OR chemic* [Title/Abstract]<br>OR biologic* [Title/Abstract]<br>OR *omic* [Title/Abstract]<br>OR molecu* [title/abstract]<br>OR clinical trial [Title/Abstract]<br>OR natural language<br>processing [Title/Abstract]<br>) |         |     | systematic review,<br>technical report |     |
| dblp | Big data analy* health<br>Advanced analy* health<br>Predictive analy* health<br>Visual analy* health<br>Machine learning health                                                                                                                                                                             | English | All | Journal article                        | 133 |

Table 6: Final search terms for the scoping review

| Criteria     | Included                                                                                                                                                                                                                                                          | Excluded                                                                                                                                                                                                                                                                                                                                            |
|--------------|-------------------------------------------------------------------------------------------------------------------------------------------------------------------------------------------------------------------------------------------------------------------|-----------------------------------------------------------------------------------------------------------------------------------------------------------------------------------------------------------------------------------------------------------------------------------------------------------------------------------------------------|
| Dates        | ≥ 2013                                                                                                                                                                                                                                                            | < 2013                                                                                                                                                                                                                                                                                                                                              |
| Language     | English                                                                                                                                                                                                                                                           | All other languages                                                                                                                                                                                                                                                                                                                                 |
| Article type | (Systematic) reviews, case studies, discussion papers, guidelines, method papers, technical reports, research papers with BDA application                                                                                                                         | Books, qualitative research, clinical trials, editorials, conference supplements, research papers without BDA application, etc.                                                                                                                                                                                                                     |
| Content      | <ul style="list-style-type: none"> <li>- big data platform</li> <li>- big data technologies</li> <li>- health data types/sources</li> <li>- analytical models for big data</li> <li>- BDA applications/use cases</li> <li>- BDA challenges/ potentials</li> </ul> | <ul style="list-style-type: none"> <li>- Natural language processing</li> <li>- big data only in the outlook</li> <li>- genetic/molecular/etc. research</li> <li>- no big data and no advanced analytics</li> <li>- too specific, not directly human health-related context, e.g. BDA for animal research, crop science or air pollution</li> </ul> |
| Filter       | machine learning for observational research                                                                                                                                                                                                                       | machine learning in general as most often used in genomic studies                                                                                                                                                                                                                                                                                   |

Table 7: Inclusion and exclusion criteria for the scoping review

| Strategy | Strategic Intervention | References mentioning BDA as supporting tool | Number and % of |
|----------|------------------------|----------------------------------------------|-----------------|
|----------|------------------------|----------------------------------------------|-----------------|

| domain                                      |                                         |                                                                                                            | References<br>(n= 72) |       |
|---------------------------------------------|-----------------------------------------|------------------------------------------------------------------------------------------------------------|-----------------------|-------|
| Empowering and engaging people              | Personalized care plans                 | [8–10, 14, 15, 24, 26, 28, 40, 42–44, 46, 47, 51, 52, 56, 59, 72, 74, 75, 87–89, 93–95, 98, 104, 116, 124] | 31                    | 43.1% |
|                                             | Self-management activities              | [22, 43, 44, 50, 74]                                                                                       | 5                     | 6.9%  |
|                                             | Shared decision making                  | [40, 51, 105, 125]                                                                                         | 4                     | 5.6%  |
|                                             | Health education                        | [15, 46, 89]                                                                                               | 3                     | 4.2%  |
|                                             | Access to personal health records       | [71, 105]                                                                                                  | 2                     | 2.8%  |
|                                             | Peer support                            | [43]                                                                                                       | 1                     | 1.4%  |
|                                             | Patient satisfaction surveys            | [74]                                                                                                       | 1                     | 1.4%  |
| Strengthening governance and accountability | Performance evaluation                  | [10, 26, 27, 45, 46, 54, 74, 79, 91, 93, 98, 100, 101, 103, 104]                                           | 15                    | 20.8% |
|                                             | Performance-based contracting           | [26, 27, 45, 79, 93, 98, 101, 104]                                                                         | 8                     | 11.1% |
|                                             | Decentralization                        | [9, 43, 74, 92, 93, 100, 124, 125]                                                                         | 8                     | 11.1% |
|                                             | Patient-reported outcomes               | [51]                                                                                                       | 1                     | 1.4%  |
| Reorienting the model of care               | Clinical decision support               | [7, 10, 14, 15, 24, 26, 27, 36, 40, 46, 48, 58, 59, 74, 76, 87, 90, 93, 95, 105, 114, 126, 127]            | 23                    | 31.9% |
|                                             | Population-based services               | [8, 14, 15, 22, 24, 26, 27, 46, 52, 56, 59, 61, 80, 87, 91, 93, 94, 124, 128]                              | 19                    | 26.4% |
|                                             | Surveillance and control systems        | [8, 14, 43, 44, 46, 47, 54, 58, 74, 88, 91, 93, 125]                                                       | 13                    | 18.1% |
|                                             | Mobile health technologies              | [7, 15, 38, 40, 41, 71, 74, 89, 104, 108]                                                                  | 10                    | 13.9% |
|                                             | Health promotion and disease prevention | [22, 28, 51, 85, 89, 98, 115, 116, 129]                                                                    | 9                     | 12.5% |
|                                             | Home and nursing care                   | [14, 50, 60, 72, 89]                                                                                       | 5                     | 6.9%  |
| Coordinating services                       | Care pathways                           | [22, 24, 61–63, 80, 124, 128]                                                                              | 8                     | 11.1% |
|                                             | Sharing of medical records              | [10, 41, 71, 76, 77, 105]                                                                                  | 6                     | 8.3%  |
|                                             | Intersectoral partnerships              | [10, 45, 50, 74, 116]                                                                                      | 5                     | 6.9%  |
|                                             | District-based healthcare delivery      | [100]                                                                                                      | 1                     | 1.4%  |
| Creating an enabling environment            | Resource allocation                     | [15, 37, 38, 40, 45, 51, 54, 79, 101, 105, 108]                                                            | 11                    | 15.3% |
|                                             | System research                         | [9, 46, 50, 75, 93, 104]                                                                                   | 6                     | 8.3%  |

|  |                    |               |   |      |
|--|--------------------|---------------|---|------|
|  | Quality assurance  | [14, 39, 113] | 3 | 4.2% |
|  | Workforce training | [74, 106]     | 2 | 2.8% |

Table 8: Matrix table on the strategic interventions of the people-centred and integrated health services framework supported by big data analytics in this scoping review

| Challenge domain | Challenge                       | References mentioning BDA challenges<br>(n = 45 (63.3%) of 71)                                           | Number and % of references (n = 72) |       |
|------------------|---------------------------------|----------------------------------------------------------------------------------------------------------|-------------------------------------|-------|
| Regulatory       | Investment framework            | [7, 27, 36, 58, 77, 85, 104]                                                                             | 7                                   | 9.7%  |
|                  | Communication framework         | [9, 36, 41, 103–105]                                                                                     | 6                                   | 8.3%  |
|                  | Intellectual property framework | [9, 14, 15, 36, 39, 41, 44, 72, 77, 88, 108]                                                             | 11                                  | 15.3% |
|                  | Evaluation framework            | [41, 46, 52, 72, 75, 76, 85, 104–106, 115, 116, 124]                                                     | 13                                  | 18.1% |
|                  | Privacy framework               | [14, 15, 27, 35–37, 41, 44, 46, 52, 54, 71, 75, 77, 85, 88, 89, 93, 105, 124]                            | 20                                  | 27.8% |
|                  | Ethics framework                | [7, 41, 88, 104, 108]                                                                                    | 5                                   | 6.9%  |
| Technological    | Data infrastructure             | [9, 15, 27, 36–38, 46, 59, 75, 77, 85, 89, 104, 108]                                                     | 14                                  | 19.4% |
|                  | Data processing                 | [9, 14, 27, 28, 36, 38, 46, 59, 72, 75, 88, 104, 108, 124]                                               | 14                                  | 19.4% |
|                  | Data linkage                    | [14, 27, 28, 36–39, 44, 46, 54, 72, 77, 85, 88, 89, 104, 108, 116, 124]                                  | 19                                  | 26.4% |
|                  | Data quality                    | [7, 10, 14, 27, 37–39, 41, 44, 46, 54, 72, 75, 77, 85, 93, 104, 108, 125]                                | 19                                  | 26.4% |
|                  | Data access & security          | [9, 14, 15, 27, 37, 38, 44, 46, 52, 54, 71, 72, 75, 77, 88, 93, 108, 124]                                | 18                                  | 25.0% |
| Methodological   | High-dimensional analytics      | [9, 44, 46]                                                                                              | 3                                   | 4.2%  |
|                  | Real-time analytics             | [14, 36, 38, 44, 72, 75, 77, 85, 88, 89, 104, 105, 124, 127]                                             | 14                                  | 19.4% |
|                  | Modelling standards & bias      | [7, 10, 14, 27, 36, 39, 44, 46, 54, 59, 72, 75, 77, 85, 87, 89, 90, 92, 93, 104, 108, 113–115, 124, 125] | 26                                  | 36.1% |
|                  | Evidence-base                   | [7, 9, 27, 36, 39, 41, 44, 46, 48, 52, 54, 56, 58, 72, 75–77, 89, 93, 104, 115, 116, 124, 125]           | 24                                  | 33.3% |
|                  | Interpretation & usability      | [7, 14, 27, 46, 48, 58, 59, 71, 72, 85, 90, 91, 93, 104, 115, 124, 125]                                  | 17                                  | 23.6% |
| Cultural         | Teamwork culture                | [9, 27, 36, 37, 46, 58, 59, 72, 75, 85, 89, 105]                                                         | 12                                  | 16.7% |
|                  | Process redesign                | [15, 27, 36, 40, 46, 72, 105]                                                                            | 7                                   | 9.7%  |
|                  | Data sharing culture            | [15, 36, 41, 44]                                                                                         | 4                                   | 5.6%  |
|                  | Data governance                 | [27, 72]                                                                                                 | 2                                   | 2.8%  |
|                  | Learning & change culture       | [9, 27, 37, 58, 72, 77, 85, 93, 105]                                                                     | 9                                   | 12.5% |

Table 9: Main challenges of BDA discussed in the screened literature



| <b>Country assignment of the first author</b> | <b>Number of publications in the review (n = 72)</b> |
|-----------------------------------------------|------------------------------------------------------|
| <i>USA</i>                                    | 43                                                   |
| <i>Canada</i>                                 | 3                                                    |
| <i>United Kingdom</i>                         | 3                                                    |
| <i>Australia</i>                              | 2                                                    |
| <i>China</i>                                  | 2                                                    |
| <i>Denmark</i>                                | 2                                                    |
| <i>Germany</i>                                | 2                                                    |
| <i>Saudi Arabia</i>                           | 2                                                    |
| <i>Spain</i>                                  | 2                                                    |
| <i>Switzerland</i>                            | 2                                                    |
| <i>Austria</i>                                | 1                                                    |
| <i>Belgium</i>                                | 1                                                    |
| <i>India</i>                                  | 1                                                    |
| <i>Italy</i>                                  | 1                                                    |
| <i>Malaysia</i>                               | 1                                                    |
| <i>Poland</i>                                 | 1                                                    |
| <i>South Africa</i>                           | 1                                                    |
| <i>Sweden</i>                                 | 1                                                    |
| <i>Turkey</i>                                 | 1                                                    |

Table 10: Publications included in the scoping review by country

| <b>Study type</b>            | <b>Number of publications in the review (n = 72)</b> |
|------------------------------|------------------------------------------------------|
| <i>Review</i>                | 24                                                   |
| <i>Case report</i>           | 17                                                   |
| <i>Quantitative analysis</i> | 13                                                   |
| <i>Technical report</i>      | 12                                                   |
| <i>Guideline</i>             | 5                                                    |
| <i>Survey</i>                | 1                                                    |

Table 11: Publications included in the scoping review by study type

| <b>Research setting</b>             | <b>Number of publications in the review (n = 72)</b> |
|-------------------------------------|------------------------------------------------------|
| <i>Research</i>                     | 34                                                   |
| <i>Hospital</i>                     | 15                                                   |
| <i>Population health management</i> | 14                                                   |
| <i>Health insurance</i>             | 5                                                    |
| <i>Pharmaceuticals</i>              | 4                                                    |

|                       |   |
|-----------------------|---|
| <i>Public health</i>  | 2 |
| <i>Community care</i> | 1 |

*Table 12: Publications included in the scoping review by setting*

## References

124. Belle A, Thiagarajan R, Soroushmehr SMR, et al. Big data analytics in healthcare. *BioMed Research International*. 2015; 1–16. DOI: <https://doi.org/10.1155/2015/370194>
125. Bragazzi NL, Alicino C, Trucchi C, et al. Global reaction to the recent outbreaks of Zika virus: insights from a big data analysis. *PLOS ONE*. 2017; 12(9): e0185263. DOI: <https://doi.org/10.1371/journal.pone.0185263>
126. Kaewprag P, Newton C, Vermillion B, et al. Predictive models for pressure ulcers from intensive care unit electronic health records using Bayesian networks. *BMC Med Inform Decis Mak*; 2017. DOI: <https://doi.org/10.1186/s12911-017-0471-z>
127. Taylor RA, Pare JR, Venkatesh AK, et al. Prediction of in-hospital mortality in emergency department patients with sepsis: a local big data-driven, machine learning approach. *Academic Emergency Medicine*. 2016; 23(3): 269–278. DOI: <https://doi.org/10.1111/acem.12876>
128. Makar M, Ghassemi M, Cutler DM, Obermeyer Z. Short-term mortality prediction for elderly patients using medicare claims data. *International Journal of Machine Learning and Computing*. 2015; 5(3): 192–197. DOI: <https://doi.org/10.7763/IJMLC.2015.V5.506>
129. Bihorac A, Ozrazgat-Baslanti T, Ebadi A, et al. MySurgeryRisk: development and validation of a machine-learning risk algorithm for major complications and death after surgery. *Annals of Surgery*. 2018; 1. DOI: <https://doi.org/10.1097/SLA.0000000000002706>
